# Supplementary material
Source: PubMed Central journal article supplement (PMC3807482)
Supplement: JB.00935-13_zjb999092870so1.pdf [file JB.00935-13_zjb999092870so1.pdf]

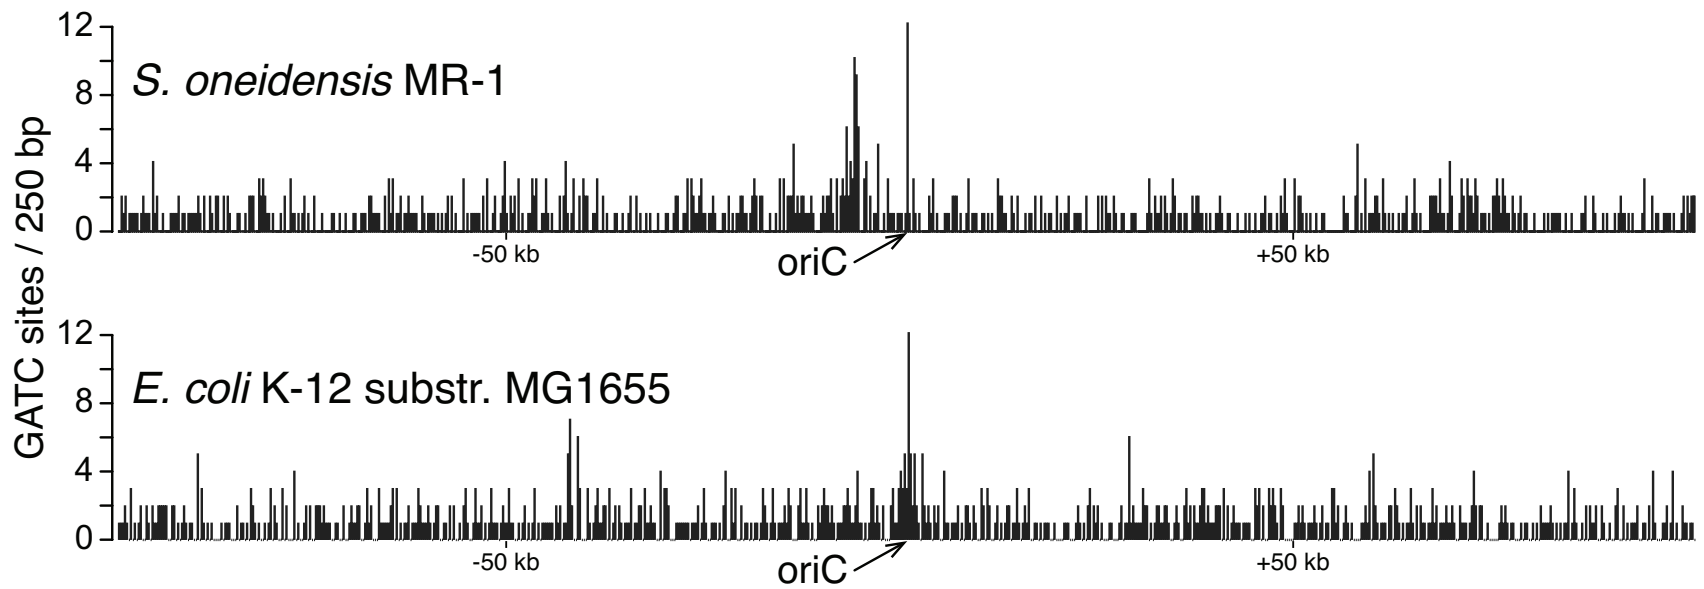

Supplementary Figure 1. Distribution of GATC motifs within 100kb of the origin of replication (oriC) of *S. oneidensis* MR-1 and *E. coli*.
